# Supplementary material for: Molecular characterization of multidrug-resistant ESKAPEE pathogens from clinical samples in Chonburi, Thailand (2017–2018)
Source: Springer Nature journal article supplement (doi:10.1186/s12879-022-07678-8), 2022-08-17
Supplement: MOESM1 [file 23374600]

**Table S1.** The antimicrobial agents and concentrations in NMIC/ID-4 panel, NMIC/ID-95 panel and PMIC/ID-55 panel.

| Panel Contents                 |      | Quality Control Organisms and Expected Results |                           |                                 |                           |                                  |
|--------------------------------|------|------------------------------------------------|---------------------------|---------------------------------|---------------------------|----------------------------------|
| Antimicrobial                  | Code | Conc. Range (µg/mL)                            | <i>E. coli</i> ATCC 25922 | <i>P. aeruginosa</i> ATCC 27853 | <i>E. coli</i> ATCC 35218 | <i>K. pneumoniae</i> ATCC 700603 |
| Amikacin                       | AN   | 8 – 32                                         | ≤0.5 – 4                  | 1 – 4                           | –                         | –                                |
| Amoxicillin/Clavulanate        | AMC  | 4/2 – 16/8                                     | 2/1 – 8/4                 | –                               | 4/2 – 16/8                | –                                |
| Ampicillin                     | AM   | 4 – 16                                         | 2 – 8                     | –                               | –                         | –                                |
| Ampicillin/Sulbactam           | SAM  | 4/2 – 16/8                                     | 2/1 – 8/4                 | –                               | 8/4 – 32/16               | –                                |
| Aztreonam                      | ATM  | 2 – 16                                         | ≤0.5                      | 2 – 8                           | –                         | –                                |
| Cefazolin                      | CZ   | 4 – 16                                         | 1 – 4                     | –                               | –                         | –                                |
| Cefepime                       | FEP  | 2 – 16                                         | ≤0.5                      | 0.5 – 4                         | –                         | –                                |
| Cefotaxime                     | CTX  | 1 – 32                                         | ≤0.5                      | 8 – 32                          | –                         | –                                |
| Ceftazidime                    | CAZ  | 1 – 16                                         | ≤0.5                      | 1 – 4                           | –                         | –                                |
| Chloramphenicol                | C    | 4 – 16                                         | 2 – 8                     | –                               | –                         | –                                |
| Ciprofloxacin                  | CIP  | 0.5 – 2                                        | ≤0.125                    | 0.25 – 1                        | –                         | –                                |
| Colistin                       | CL   | 0.5 – 2                                        | ≤0.5 – 2                  | ≤0.5 – 4                        | –                         | –                                |
| ESBL                           | ESBL | –                                              | NEG                       | –                               | –                         | POS                              |
| Gentamicin                     | GM   | 2 – 8                                          | ≤0.5 – 1                  | ≤0.5 – 2                        | –                         | –                                |
| Imipenem                       | IPM  | 1 – 8                                          | ≤0.25                     | 1 – 4                           | –                         | –                                |
| Levofloxacin                   | LVX  | 1 – 8                                          | ≤0.25                     | 0.5 – 4                         | –                         | –                                |
| Meropenem                      | MEM  | 1 – 8                                          | ≤0.25                     | ≤0.25 – 1                       | –                         | –                                |
| Moxifloxacin                   | MXF  | 1 – 4                                          | ≤0.125                    | 1 – 8                           | –                         | –                                |
| Piperacillin                   | PIP  | 4 – 64                                         | 1 – 4                     | 1 – 8                           | –                         | –                                |
| Piperacillin/Tazobactam        | TZP  | 4/4 – 64/4                                     | 1/4 – 4/4                 | 1/4 – 8/4                       | ≤0.5/4 – 2/4              | –                                |
| Tetracycline                   | TE   | 2 – 8                                          | ≤0.5 – 2                  | 8 – >16                         | –                         | –                                |
| Trimethoprim/Sulfamethoxazole  | SXT  | 0.5/9.5 – 2/38                                 | ≤0.5/9.5                  | 8/152 – >16/304                 | –                         | –                                |
| Cefotaxime/Clavulanate (ESBL)  | CCX  | <9                                             | N/A                       | –                               | –                         | N/A                              |
| Ceftazidime/Clavulanate (ESBL) | CCZ  | <9                                             | N/A                       | –                               | –                         | N/A                              |
| Cefpodoxime-proxetil (ESBL)    | CPD  | <9                                             | N/A                       | –                               | –                         | N/A                              |
| Ceftazidime (ESBL)             | CAZ  | <9                                             | N/A                       | –                               | –                         | N/A                              |
| Ceftriaxone/Clavulanate (ESBL) | CCR  | <9                                             | N/A                       | –                               | –                         | N/A                              |

\*Refer to the BD Phoenix System User's Manual.

| Panel Contents                 |      | Quality Control Organisms and Expected Results |                           |                                 |                           |                                  |
|--------------------------------|------|------------------------------------------------|---------------------------|---------------------------------|---------------------------|----------------------------------|
| Antimicrobial                  | Code | Conc. Range (µg/mL)                            | <i>E. coli</i> ATCC 25922 | <i>P. aeruginosa</i> ATCC 27853 | <i>E. coli</i> ATCC 35218 | <i>K. pneumoniae</i> ATCC 700603 |
| Amoxicillin/Clavulanate        | AMC  | 4/2 – 16/8                                     | 2/1 – 8/4                 | –                               | 4/2 – 16/8                | –                                |
| Ampicillin                     | AM   | 4 – 16                                         | 2 – 8                     | –                               | –                         | –                                |
| Aztreonam                      | ATM  | 2 – 16                                         | <0.5                      | 2 – 8                           | –                         | –                                |
| Cefepime                       | FEP  | 1 – 16                                         | <0.5                      | 0.5 – 4                         | –                         | –                                |
| Cefoxitin                      | FOX  | 4 – 16                                         | 2 – 8                     | –                               | –                         | –                                |
| Ceftazidime                    | CAZ  | 2 – 16                                         | ≤0.5                      | 1 – 4                           | –                         | –                                |
| Ceftriaxone                    | CRO  | 1 – 16                                         | ≤0.5                      | 8 – 64                          | –                         | –                                |
| Cefuroxime                     | CXM  | 4 – 16                                         | 2 – 8                     | –                               | –                         | –                                |
| Cephalothin                    | CF   | 4 – 16                                         | 4 – 16                    | –                               | –                         | –                                |
| Chloramphenicol                | C    | 4 – 16                                         | 2 – 8                     | –                               | –                         | –                                |
| Ciprofloxacin                  | CIP  | 0.5 – 2                                        | ≤0.125                    | 0.25 – 1                        | –                         | –                                |
| Colistin                       | CL   | 1 – 4                                          | ≤0.5 – 2                  | ≤0.5 – 4                        | –                         | –                                |
| Ertapenem                      | ETP  | 0.25 – 1                                       | ≤0.25                     | –                               | –                         | –                                |
| Gentamicin                     | GM   | 2 – 8                                          | ≤0.5 – 1                  | ≤0.5 – 2                        | –                         | –                                |
| Imipenem                       | IPM  | 1 – 8                                          | ≤0.25                     | 1 – 4                           | –                         | –                                |
| Meropenem                      | MEM  | 1 – 8                                          | ≤0.25                     | ≤0.25 – 1                       | –                         | –                                |
| Nitrofurantoin                 | FM   | 16 – 64                                        | ≤8 – 16                   | –                               | –                         | –                                |
| Norflloxacin                   | NOR  | 2 – 8                                          | ≤0.25                     | 1 – 4                           | –                         | –                                |
| Piperacillin/Tazobactam        | TZP  | 4/4 – 64/4                                     | 1/4 – 4/4                 | 1/4 – 8/4                       | ≤0.5/4 – 2/4              | –                                |
| Tobramycin                     | NN   | 2 – 8                                          | 0.25 – 1                  | 0.25 – 1                        | –                         | –                                |
| Trimethoprim                   | TMP  | 1 – 8                                          | ≤0.5 – 2                  | >16                             | –                         | –                                |
| Trimethoprim/Sulfamethoxazole  | SXT  | 0.5/9.5 – 2/38                                 | ≤0.5/9.5                  | 8/152 – >16/304                 | –                         | –                                |
| ESBL                           | ESBL | –                                              | NEG                       | –                               | –                         | POS                              |
| Cefotaxime/Clavulanate (ESBL)  | CCX  | <9                                             | N/A                       | –                               | –                         | N/A                              |
| Ceftazidime/Clavulanate (ESBL) | CCZ  | <9                                             | N/A                       | –                               | –                         | N/A                              |
| Cefpodoxime-proxetil (ESBL)    | CPD  | <9                                             | N/A                       | –                               | –                         | N/A                              |
| Ceftazidime (ESBL)             | CAZ  | <9                                             | N/A                       | –                               | –                         | N/A                              |
| Ceftriaxone/Clavulanate (ESBL) | CCR  | <9                                             | N/A                       | –                               | –                         | N/A                              |

\*Refer to the BD Phoenix System User's Manual.

| Panel Contents                    |      | Quality Control Organisms and Expected Results |                             |                               |                               |                             |
|-----------------------------------|------|------------------------------------------------|-----------------------------|-------------------------------|-------------------------------|-----------------------------|
| Antimicrobial                     | Code | Conc. Range (µg/mL)                            | <i>S. aureus</i> ATCC 29213 | <i>E. faecalis</i> ATCC 29212 | <i>E. faecalis</i> ATCC 51299 | <i>S. aureus</i> ATCC 25923 |
| Amikacin                          | AN   | 8 – 32                                         | 1 – 8                       | –                             | –                             | –                           |
| Amoxicillin/Clavulanate           | AMC  | 1/0.5 – 4/2                                    | ≤0.25/0.125 – 0.5/0.25      | ≤0.25/0.125 – 1/0.5           | –                             | –                           |
| Ampicillin                        | AM   | 2 – 8                                          | 0.5 – >1                    | 0.5 – 2                       | –                             | –                           |
| Beta-Lactamase (Nitrocefin-based) | NCF  | <10                                            | POS                         | –                             | –                             | NEG                         |
| Cefoxitin                         | FOX  | 2 – 8                                          | ≤1 – 4                      | –                             | –                             | –                           |
| Ciprofloxacin                     | CIP  | 0.25 – 4                                       | ≤0.125 – 0.5                | 0.5 – 4                       | –                             | –                           |
| Clindamycin                       | CC   | 0.5 – 2                                        | ≤0.125 – 0.25               | 4 – >8                        | –                             | –                           |
| Erythromycin                      | E    | 0.25 – 4                                       | 0.25 – 1                    | –                             | –                             | –                           |
| Fusidic Acid                      | FA   | 1 – 8                                          | ≤0.5 – 1                    | 1 – 4                         | –                             | –                           |
| Gentamicin                        | GM   | 1 – 8                                          | ≤0.5 – 1                    | –                             | –                             | –                           |
| Gentamicin-Synergy                | GMS  | 500                                            | –                           | ≤500                          | >500                          | –                           |
| Linezolid                         | LZD  | 0.5 – 4                                        | 1 – 4                       | 1 – 4                         | –                             | –                           |
| Mupirocin                         | MUP  | 1 – 4                                          | ≤0.5                        | >8                            | –                             | –                           |
| Mupirocin-High Level              | MUH  | 256                                            | ≤256                        | ≤256                          | –                             | –                           |
| Nitrofurantoin                    | FM   | 16 – 64                                        | ≤16 – 32                    | ≤16                           | –                             | –                           |
| Oxacillin                         | OX   | 0.25 – 2                                       | 0.125 – 0.5                 | >4                            | –                             | –                           |
| Penicillin                        | P    | 0.0625 – 0.25                                  | 0.25 – >1                   | 1 – 4                         | –                             | –                           |
| Quinupristin/Dalfopristin         | SYN  | 0.5 – 2                                        | ≤0.5 – 1                    | 2 – >4                        | –                             | –                           |
| Rifampin                          | RA   | 0.5 – 2                                        | ≤0.25                       | –                             | –                             | –                           |
| Teicoplanin                       | TEC  | 1 – 16                                         | ≤0.5 – 1                    | ≤0.5                          | –                             | –                           |
| Tetracycline                      | TE   | 0.5 – 8                                        | ≤0.5 – 1                    | 8 – >16                       | –                             | –                           |
| Tobramycin                        | NN   | 2 – 8                                          | ≤1                          | –                             | –                             | –                           |
| Trimethoprim                      | TMP  | 0.5 – 2                                        | 1 – 4                       | ≤0.5 – 1                      | –                             | –                           |
| Trimethoprim/Sulfamethoxazole     | SXT  | 1/19 – 4/76                                    | ≤0.5/9.5                    | ≤0.5/9.5                      | –                             | –                           |
| Vancomycin                        | VA   | 1 – 16                                         | ≤0.5 – 2                    | 1 – 4                         | –                             | –                           |

\*Refer to the BD Phoenix System User's Manual.
